# Supplementary material for: Multifunctional black phosphorus pressure sensors with bending angle monitoring and direction recognition characteristics
Source: Royal Society of Chemistry journal article supplement (doi:10.1039/d3nr05372e), 2024-01-01
Supplement: d3nr05372e3.pdf [file d3nr05372e3.pdf]

## *Supporting Information*

### **Multifunctional black phosphorus pressure sensors with bending angle and direction recognition characteristics**

Jiangtao Chen,<sup>a\*</sup> Guobin Ma,<sup>a</sup> Xinyi Wang,<sup>a</sup> Tiancheng Song,<sup>a</sup> Yirun Zhu,<sup>a</sup> Shuangju Jia,<sup>a</sup>  
Xuqiang Zhang,<sup>a</sup> Yun Zhao,<sup>a</sup> Jianbiao Chen,<sup>a</sup> Bingjun Yang,<sup>b</sup> and Yan Li<sup>a</sup>

<sup>a</sup>Key Laboratory of Atomic and Molecular Physics & Functional Materials of Gansu Province, College of Physics and Electronic Engineering, Northwest Normal University, Lanzhou 730070, China

<sup>b</sup>Laboratory of Clean Energy Chemistry and Materials, State Key Laboratory of Solid Lubrication, Lanzhou Institute of Chemical Physics, Chinese Academy of Sciences, Lanzhou 730000, China

#### **The file includes:**

**Figure S1** (a) the photograph of the vacuum-filtered BP film, (b) surface SEM observation of black phosphorus film.

**Figure S2** BP dispersion in NMP (a) and Tyndall phenomenon (b).

**Figure S3** UV-vis-NIR absorption spectrum of BP dispersion in NMP.

**Figure S4** SAED pattern of BP nanoflakes.

**Figure S5** Lateral size distribution of BP nanoflakes.

**Figure S6** AFM topography of BP (a), and corresponding height profiles along the white lines (b) and (c).

**Figure S7** The photograph of the interdigital electrode fabricated by thermal-evaporated copper film on flexible PI substrate.

**Figure S8** The resistance changes of the device under different applied pressures.

**Figure S9** Response and recovery curve of the sensor under the pressure of 40 kPa.

**Figure S10** The stability test of the sensor over 1400 loading-unloading cycles under pressure of 24 kPa.

**Figure S11** The sensing curves of handwriting process with numbers 0-9 (a, b) and English letters A-Z (c, d, e and f). The handwriting process is performed by volunteer.

**Figure S12** Schematic diagram of remote monitoring, collecting current change by a multimeter and showing on a mobile phone in real time via a Bluetooth module.

**Figure S13** The durability of the sensor under bending cycling test with angles of 10 and 25°.

**Figure S14** Photograph of BP-based pressure sensor array that fixed on a piece of glass.

**Figure S15** Photograph of our home-made  $\text{Cu}_2\text{ZnSn}(\text{S},\text{Se})_4$  thin film solar cell arrays.

**Figure S16** Current density-voltage (J-V) characteristics of the solar cell based on  $\text{Cu}_2\text{ZnSn}(\text{S},\text{Se})_4$  under calibrated AM 1.5G illumination generated by an AAA-class solar simulator (Oriel Sol3A 94023A, from Newport), current-voltage (I-V) curves were recorded on a Keithley 4200-SCS semiconductor measurement system.

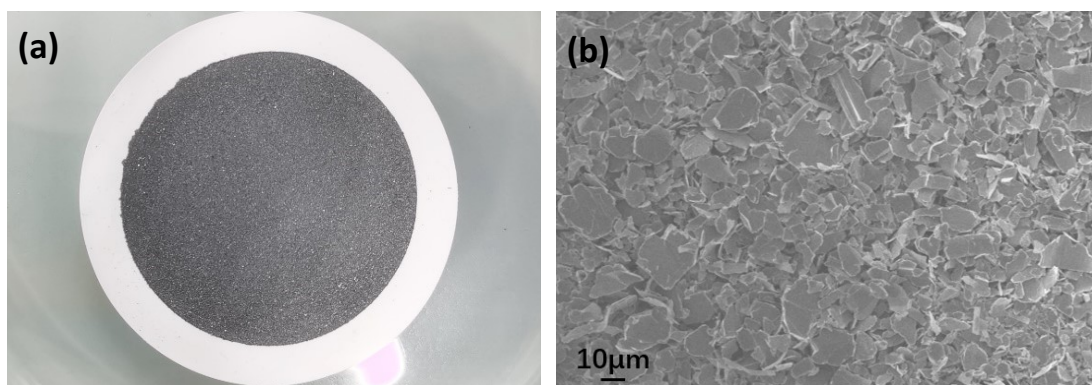

**Figure S1** (a) the photograph of the vacuum-filtered BP film, (b) surface SEM observation of black phosphorus film.

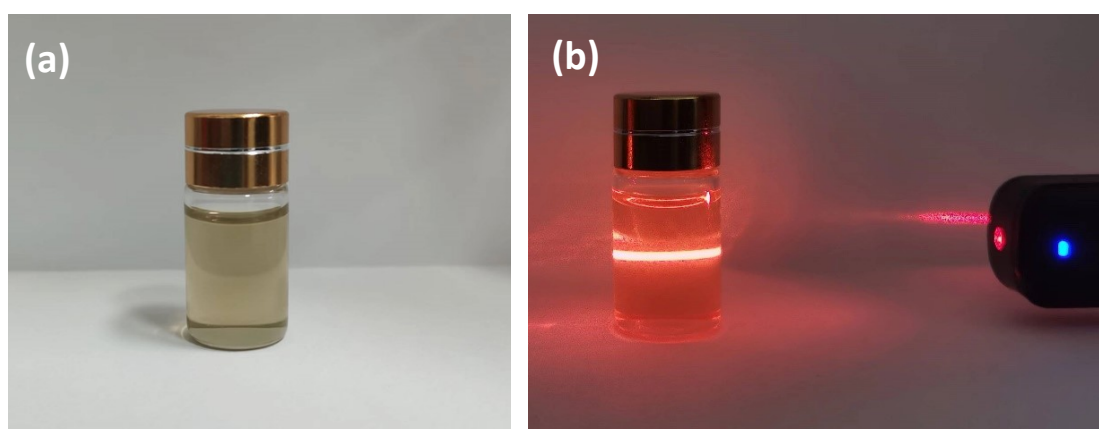

**Figure S2** BP dispersion in NMP (a) and Tyndall phenomenon (b).

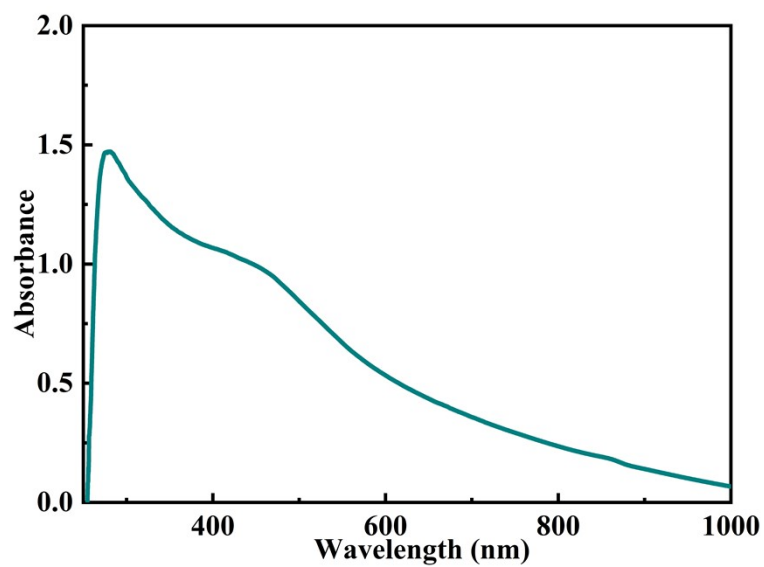

**Figure S3** UV-vis-NIR absorption spectrum of BP dispersion in NMP.

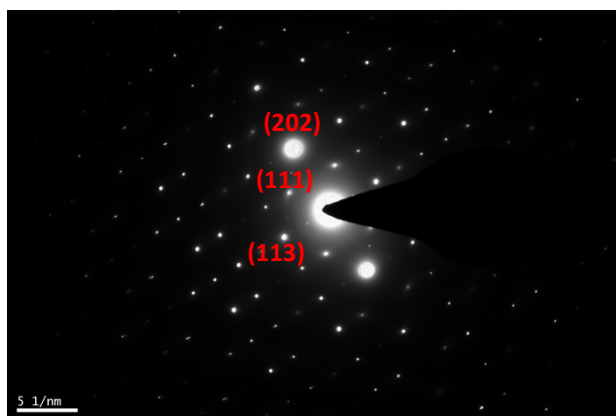

**Figure S4** SAED pattern of BP nanoflakes.

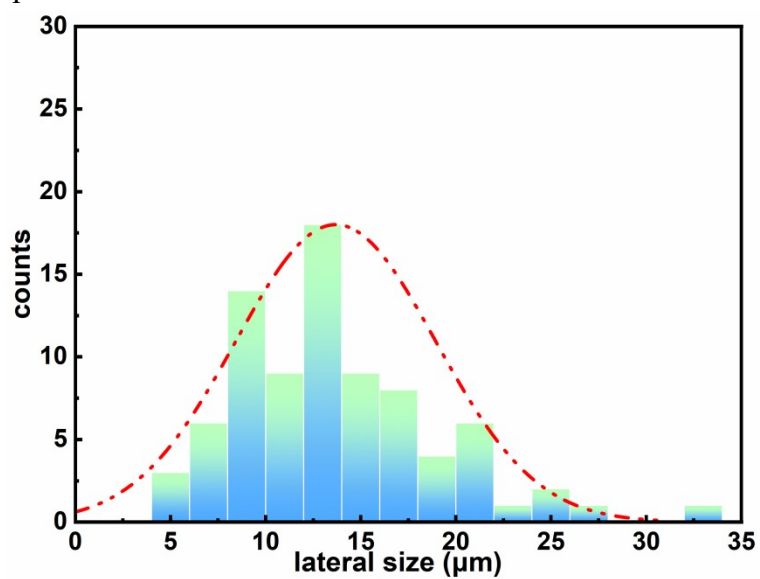

**Figure S5** Lateral size distribution of BP nanoflakes.

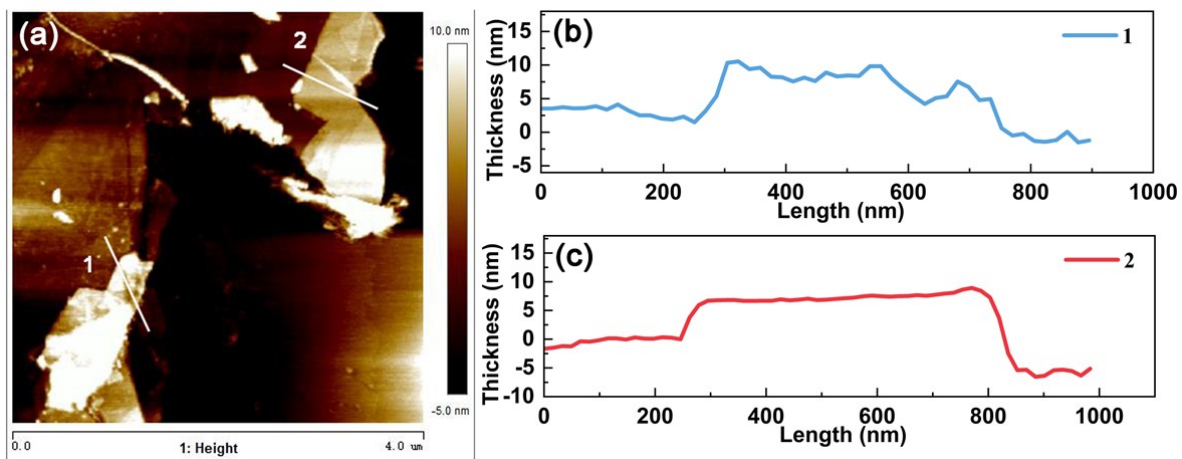

**Figure S6** AFM topography of BP (a), and corresponding height profiles along the white lines (b) and (c).

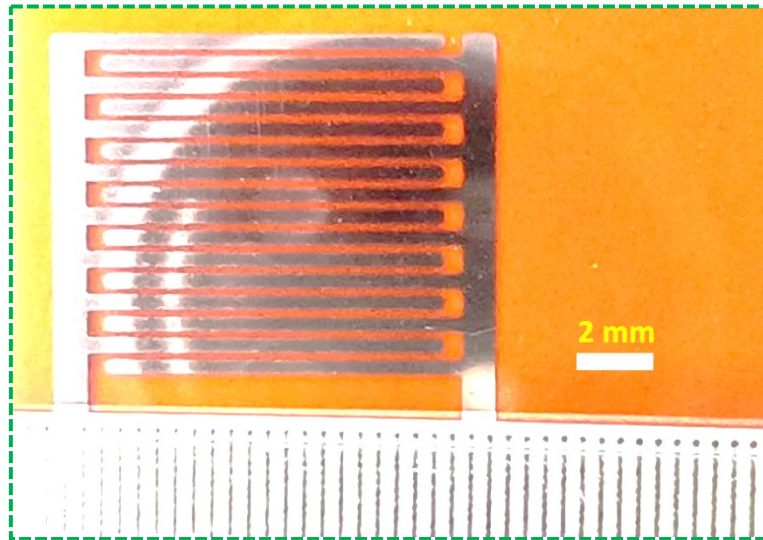

**Figure S7** The photograph of the interdigital electrode fabricated by thermal-evaporated copper film on flexible PI substrate.

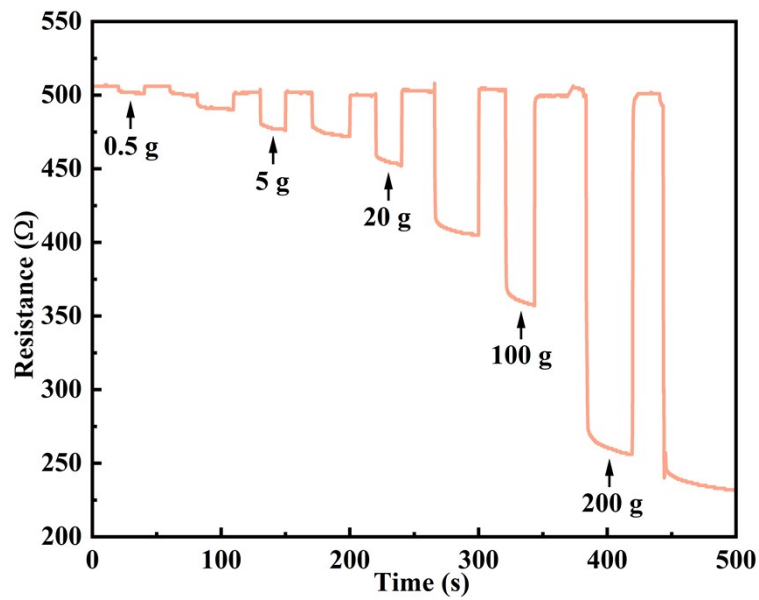

**Figure S8** The resistance changes of the device under different applied pressures.

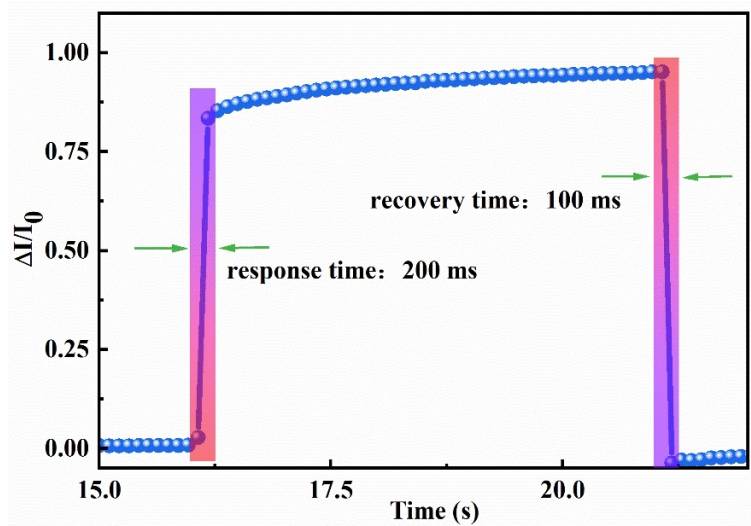

**Figure S9** Response and recovery curve of the sensor under the pressure of 40 kPa.

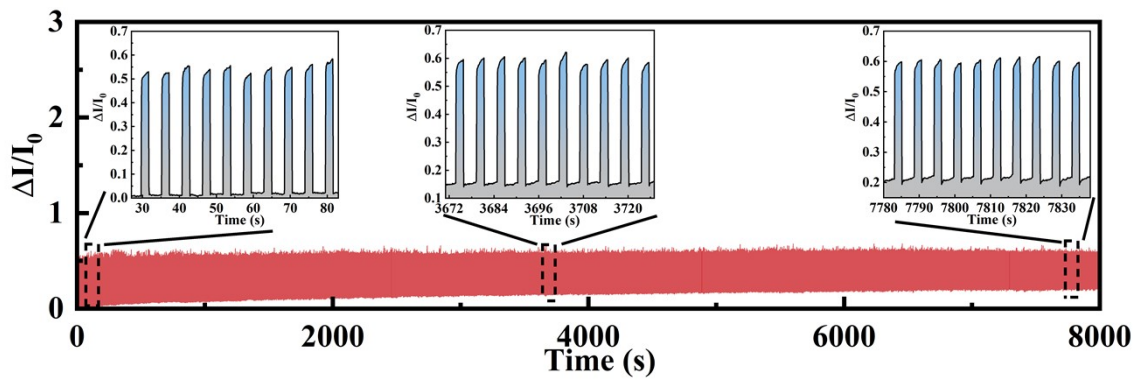

**Figure S10** The stability test of the sensor over 1400 loading-unloading cycles under pressure of 24 kPa.

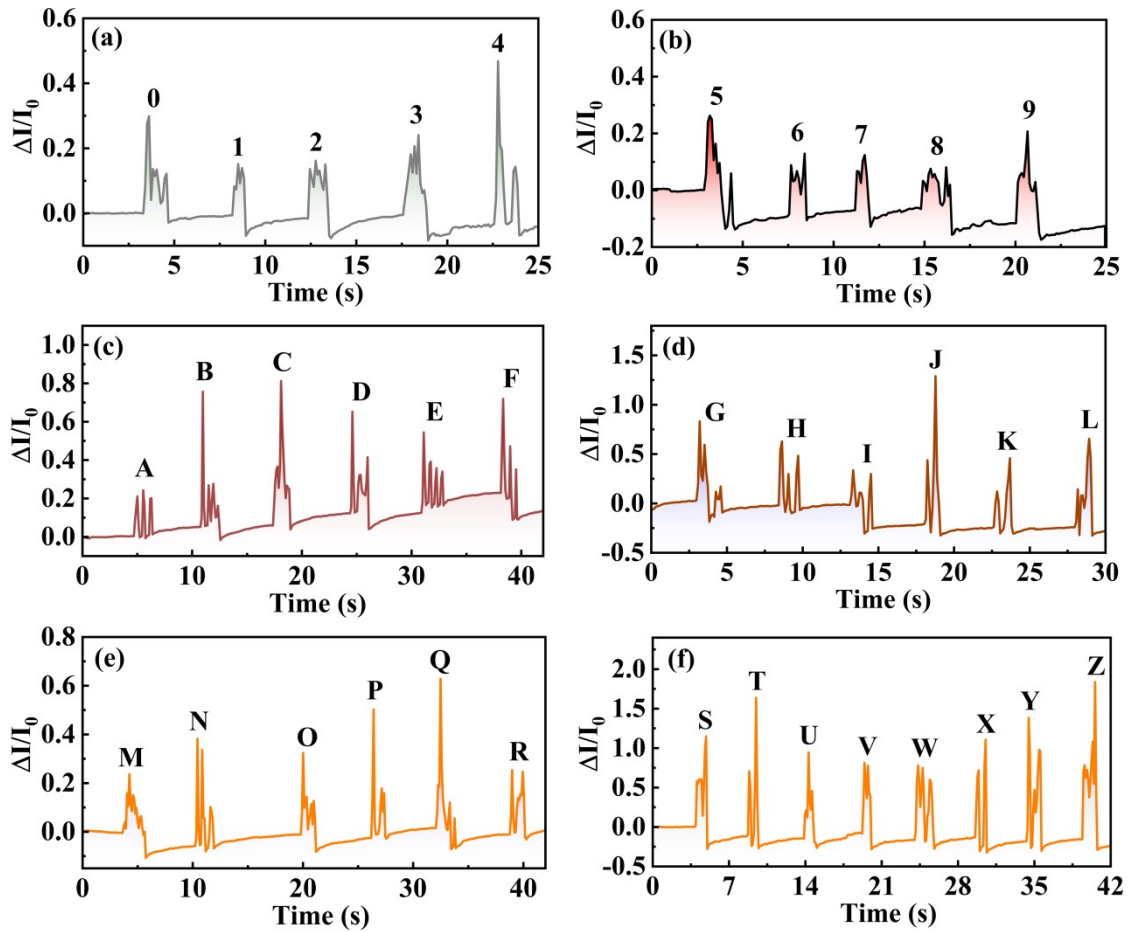

**Figure S11** The sensing curves of handwriting process with numbers 0-9 (a, b) and English letters A-Z (c, d, e and f). The handwriting process is performed by volunteer.

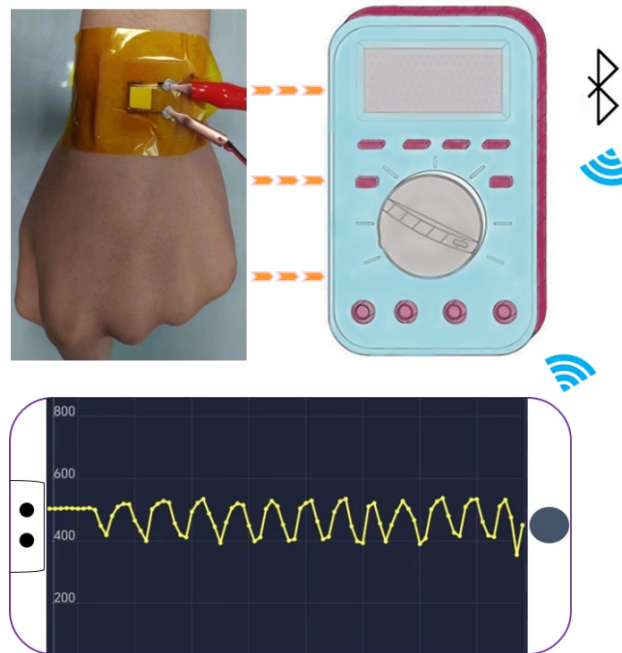

**Figure S12** Schematic diagram of remote monitoring, collecting current change by a multimeter and showing on a mobile phone in real time via a Bluetooth module.

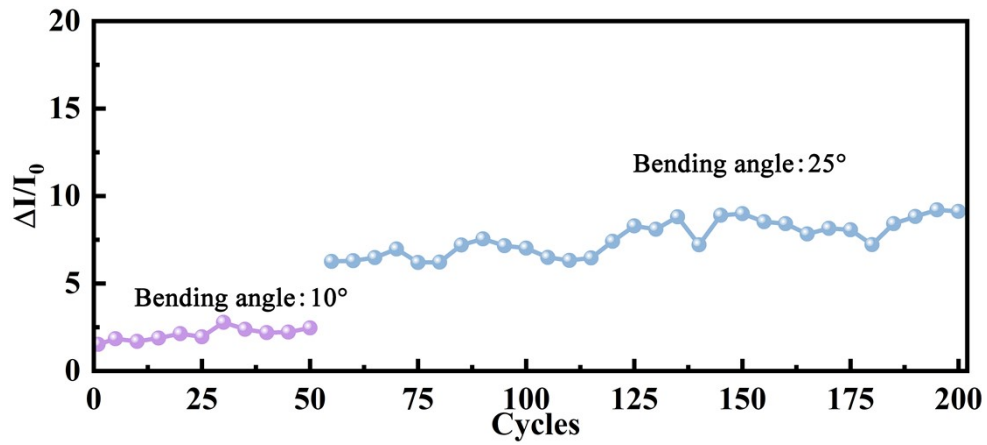

**Figure S13** The durability of the sensor under bending cycling test with angles of 10 and 25°.

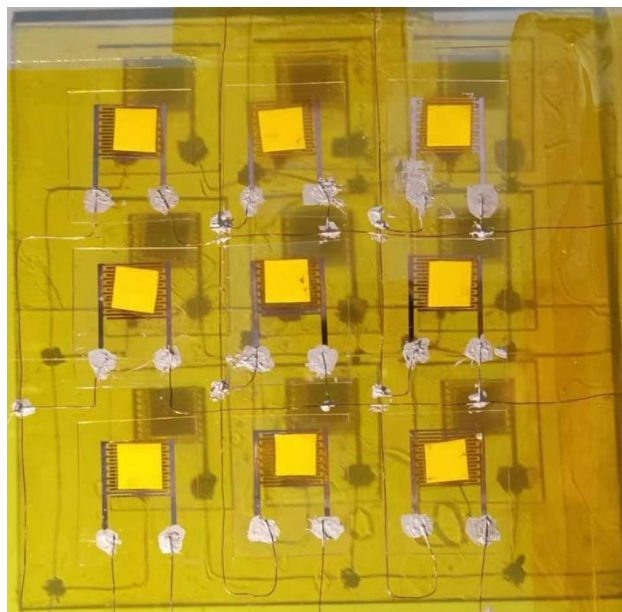

**Figure S14** Photograph of BP-based pressure sensor array that fixed on a piece of glass.

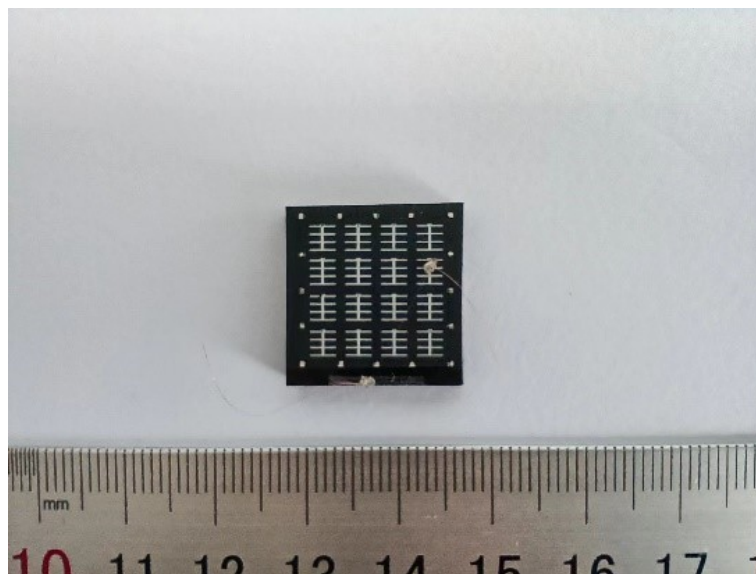

**Figure S15** Photograph of our home-made  $\text{Cu}_2\text{ZnSn}(\text{S,Se})_4$  thin film solar cell arrays.

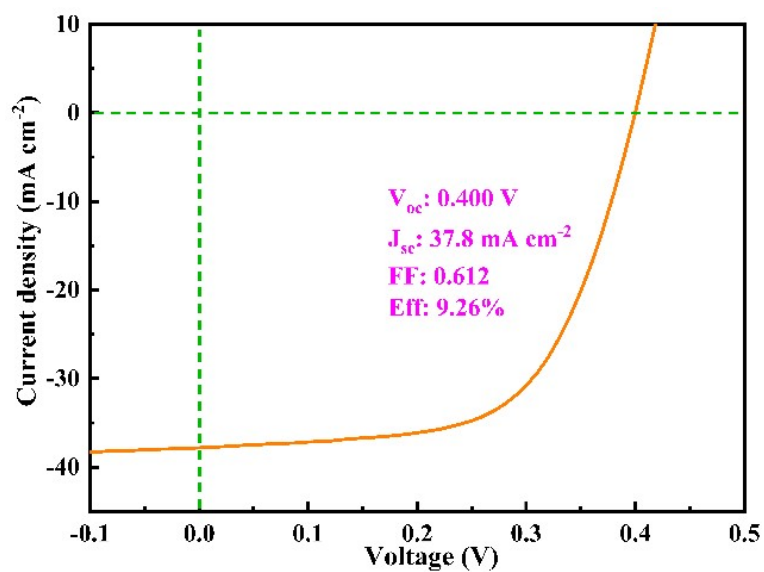

**Figure S16** Current density-voltage (J-V) characteristics of the solar cell based on  $\text{Cu}_2\text{ZnSn}(\text{S},\text{Se})_4$  under calibrated AM 1.5G illumination generated by an AAA-class solar simulator (Oriel Sol3A 94023A, from Newport), current-voltage (I-V) curves were recorded on a Keithley 4200-SCS semiconductor measurement system.
